# Supplementary material for: Screening of Antimicrobial Activities and Lipopeptide Production of Endophytic Bacteria Isolated from Vetiver Roots
Source: MDPI journal article supplement (doi:10.3390/microorganisms10020209), 2022-01-19
Supplement: s1 [file s1]

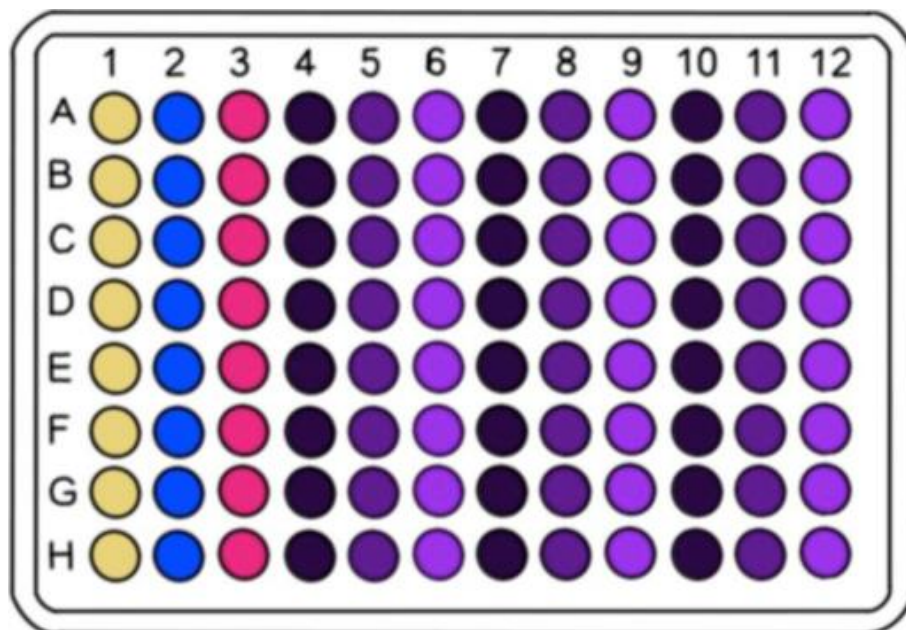

Figure S1 The layout of 96 well plates for growth inhibition test against *E. coli* and *S. cerevisiae*

Plate design for liquid antimicrobial activity testing. Each plate line is used to test a supernatant. Column 1 (●) is the sterility control (200  $\mu$ L of culture medium (Muller Hinton for *E. coli*, and YPG for *S. cerevisiae*)), column 2 (●) is the supernatant sterility control (50  $\mu$ L of supernatant + 150  $\mu$ L of culture medium), column 3 (●) corresponds to the growth control (100  $\mu$ L of culture medium + 100  $\mu$ L of target strain). Columns 4, 7 and 10 (●) correspond to growth in the culture medium in the presence of the tested supernatant diluted by 1/2 (100  $\mu$ L of supernatant + 100  $\mu$ L of inoculum). Columns 5, 8 and 11 (●) correspond to growth in culture medium in the presence of 1/4 diluted test supernatant (100  $\mu$ L of mixture from columns 4, 7 and 10 respectively + 100  $\mu$ L of culture medium – 100 $\mu$ L of mixture + 100  $\mu$ L of inoculum). Columns 6, 9 and 12 (●) correspond to growth in culture medium in the presence of the 1/8 diluted test supernatant (100  $\mu$ L of mixture from columns 5, 8 and 10 respectively + 100  $\mu$ L of culture medium - 100  $\mu$ L of mixture + 100  $\mu$ L of inoculum).

Table S1 Summary of the growth inhibition rate in the dual-culture test and the diffusion assay of the cell-free supernatant samples against *F. graminearum*, *F. culmorum*, and *F. oxysporum*.

| Strain | Genbank accession | Accession (Munakata et al., 2021) | BLAST top hit species                                | Dual-culture test <sup>*1</sup>               |                    |                     | Diffusion assay with cell-free supernatant <sup>*1</sup> |            |                    |             |                     |            |
|--------|-------------------|-----------------------------------|------------------------------------------------------|-----------------------------------------------|--------------------|---------------------|----------------------------------------------------------|------------|--------------------|-------------|---------------------|------------|
|        |                   |                                   |                                                      | <i>F. graminearum</i> (Munakata et al., 2021) | <i>F. culmorum</i> | <i>F. oxysporum</i> | <i>F. graminearum</i>                                    |            | <i>F. culmorum</i> |             | <i>F. oxysporum</i> |            |
|        |                   |                                   |                                                      |                                               |                    |                     | King's B                                                 | NB         | King's B           | NB          | King's B            | NB         |
| 1      | OK662633          | M1_08                             | <i>Yokenella regensburgei</i>                        | 71.3                                          | 26.8 ± 5           | 27.7 ± 8.1          | 0 ± 0                                                    | 1.9 ± 2.6  | 2.3 ± 3.3          | 11 ± 13.5   | 0 ± 0               | 1.0 ± 1.3  |
| 2      | OK662634          | P2_02                             | <i>Pseudomonas koreensis</i>                         | 73.5                                          | 11.4 ± 12.1        | 1.7 ± 1.9           | 0 ± 0                                                    | 1.9 ± 2.6  | 0 ± 0              | 2.2 ± 3.1   | 0 ± 0               | 0.9 ± 1.3  |
| 3      | OK662635          | P2_06                             | <i>Pseudomonas vancoverensis</i>                     | 78.5                                          | 8.8 ± 8.4          | 18.9 ± 17.4         | 2.0 ± 2.9                                                | 3.0 ± 2.6  | 0 ± 0              | 5.3 ± 3.3   | 0 ± 0               | 0 ± 0      |
| 4      | OK662636          | P2_15                             | <i>Serratia grimesii</i>                             | 73.1                                          | 46.2 ± 3.3         | 48.7 ± 7.7          | 5.1 ± 7.1                                                | 2.7 ± 3.8  | 0 ± 0              | 6.0 ± 4.2   | 17.7 ± 14.1         | 1.8 ± 2.5  |
| 5      | OK662637          | P2_16                             | <i>Pseudomonas vancoverensis</i>                     | 72.1                                          | 1.1 ± 1.9          | 17.4 ± 3.5          | 0 ± 0                                                    | 0.9 ± 1.3  | 0 ± 0              | 2.0 ± 2.8   | 8.0 ± 9.2           | 4.4 ± 2.3  |
| 6      | OK662638          | P2_25                             | <i>Pseudomonas vancoverensis</i>                     | 79.2                                          | 3.2 ± 5.6          | 6.1 ± 10.5          | 0 ± 0                                                    | 4.8 ± 2.5  | 4.0 ± 2.8          | 0 ± 0       | 6.9 ± 9.8           | 4.3 ± 3.2  |
| 7      | OK662639          | P2_28                             | <i>Microbacterium hominis</i>                        | 70.6                                          | 10.9 ± 6.2         | 0 ± 0               | 4.2 ± 5.9                                                | 4.2 ± 5.9  | 4.8 ± 6.7          | 1.0 ± 1.5   | 0 ± 0               | 0.9 ± 1.2  |
| 8      | OK662640          | P3_01                             | <i>Serratia grimesii</i>                             | 72.1                                          | 45.3 ± 2.7         | 48.1 ± 9.6          | 5.2 ± 5.3                                                | 5.9 ± 4.8  | 4.4 ± 4.4          | 2.9 ± 4.0   | 2.1 ± 2.9           | 0 ± 0      |
| 9      | OK662641          | P3_07                             | <i>Serratia grimesii</i>                             | 73.1                                          | 46.1 ± 4           | 37.2 ± 27.5         | 2.0 ± 1.4                                                | 5.8 ± 5.0  | 4.4 ± 4.4          | 4.1 ± 3.5   | 2.9 ± 4.0           | 3.5 ± 3.3  |
| 10     | OK662959          | P3_08                             | <i>Pseudomonas koreensis</i>                         | 71.0                                          | 16.5 ± 11.7        | 0.2 ± 0.4           | 4.9 ± 4.8                                                | 4.4 ± 6.2  | 1.0 ± 1.4          | 4.2 ± 3.0   | 1.8 ± 2.5           | 0.9 ± 1.3  |
| 11     | OK662642          | P3_13                             | <i>Serratia grimesii</i>                             | 74.9                                          | 45.7 ± 4.6         | 48.3 ± 4.2          | 3.1 ± 2.3                                                | 4.5 ± 1.2  | 0 ± 0              | 5.7 ± 5.9   | 6.2 ± 6.9           | 1.8 ± 2.5  |
| 12     | OK662643          | P3_17                             | <i>Serratia grimesii</i>                             | 73.8                                          | 39.9 ± 5.2         | 46.6 ± 3            | 1.9 ± 2.6                                                | 3.7 ± 2.6  | 1.0 ± 1.4          | 4.6 ± 3.3   | 0 ± 0               | 0.9 ± 1.2  |
| 13     | OK662644          | P3_18                             | <i>Pseudomonas koreensis</i>                         | 70.6                                          | 8.6 ± 11.9         | 6.7 ± 2.4           | 2.8 ± 3.9                                                | 1.9 ± 1.4  | 0 ± 0              | 6.2 ± 4.5   | 0.9 ± 1.2           | 0.9 ± 1.2  |
| 14     | OK662645          | P3_19                             | <i>Pseudomonas koreensis</i>                         | 71.7                                          | 12.4 ± 6.7         | 11.6 ± 1.5          | 2.9 ± 2.3                                                | 3.1 ± 4.4  | 1.0 ± 1.5          | 5.6 ± 6.0   | 0 ± 0               | 0.9 ± 1.3  |
| 15     | OK662646          | P3_24                             | <i>Pseudomonas koreensis</i>                         | 74.2                                          | 15.3 ± 5.6         | 1.9 ± 3.3           | 3.2 ± 2.6                                                | 1.1 ± 1.5  | 4.3 ± 1.8          | 1.9 ± 2.6   | 0 ± 0               | 2.7 ± 2.2  |
| 16     | OK662647          | P3_25                             | <i>Serratia grimesii</i> strain                      | 73.1                                          | 43.1 ± 5.1         | 47 ± 6.3            | 6.3 ± 6.8                                                | 2.0 ± 2.8  | 6.1 ± 2.2          | 0 ± 0       | 3.8 ± 3.4           | 0 ± 0      |
| 17     | OK662648          | P3_26                             | <i>Pseudomonas koreensis</i>                         | 72.1                                          | 23.9 ± 6.8         | 4.8 ± 4.3           | 2.1 ± 2.9                                                | 10 ± 9.9   | 2.0 ± 2.9          | 1.9 ± 2.7   | 0 ± 0               | 0 ± 0      |
| 18     | OK662649          | P3_27                             | <i>Pseudomonas koreensis</i>                         | 73.8                                          | 11.2 ± 10          | 4.6 ± 7.9           | 1.1 ± 1.6                                                | 4.9 ± 6.9  | 1.0 ± 1.4          | 1.9 ± 2.7   | 1.9 ± 2.7           | 0 ± 0      |
| 19     | OK662650          | P3_28                             | <i>Serratia grimesii</i>                             | 78.1                                          | 49.9 ± 5.2         | 46 ± 3.1            | 2.2 ± 3.1                                                | 1.0 ± 1.4  | 0 ± 0              | 1.9 ± 1.4   | 1.9 ± 2.7           | 0 ± 0      |
| 20     | OK662651          | P3_29                             | <i>Serratia grimesii</i>                             | 79.9                                          | 53.4 ± 7           | 55.3 ± 9.6          | 3.2 ± 2.6                                                | 7.9 ± 6.2  | 2.0 ± 2.8          | 1.0 ± 1.4   | 0 ± 0               | 0 ± 0      |
| 21     | OK662652          | P3_30                             | <i>Serratia grimesii</i>                             | 73.5                                          | 51.2 ± 3.5         | 55.2 ± 5.8          | 3.2 ± 2.6                                                | 5.0 ± 5.2  | 0 ± 0              | 1.0 ± 1.4   | 1.0 ± 1.3           | 1.0 ± 1.3  |
| 22     | OK662653          | R22_05                            | <i>Bacillus subtilis</i>                             | 81.7                                          | 45.8 ± 2.9         | 33 ± 5.6            | 35.4 ± 0.8                                               | 38.1 ± 4.9 | 36.8 ± 1.0         | 24.3 ± 3.8  | 31.9 ± 14.7         | 0 ± 0      |
| 23     | OK662654          | R22_06                            | <i>Bacillus subtilis</i>                             | 81.7                                          | 46.5 ± 5.2         | 39.2 ± 2.8          | 37.8 ± 1.2                                               | 39.7 ± 4.5 | 32.5 ± 6.1         | 22.6 ± 17.6 | 42.8 ± 1.3          | 0 ± 0      |
| 24     | OK662655          | R22_08                            | <i>Pseudomonas nitroreducens</i>                     | 70.0                                          | 26.4 ± 9.7         | 27.7 ± 6.5          | 4.1 ± 3.8                                                | 4.0 ± 3.8  | 1.1 ± 1.6          | 1.0 ± 1.3   | 1.9 ± 2.6           | 0 ± 0      |
| 25     | OK662656          | R23_08                            | <i>Bacillus tequilensis</i>                          | 75.0                                          | 37.7 ± 7.9         | 41 ± 0.2            | 3.1 ± 2.5                                                | 4.1 ± 1.4  | 3.4 ± 4.9          | 1.9 ± 2.7   | 0 ± 0               | 0.9 ± 1.3  |
| 26     | OK662657          | R23_12                            | <i>Bacillus subtilis</i>                             | 70.0                                          | 47.4 ± 2.2         | 41.1 ± 4.3          | 37.5 ± 1.6                                               | 34.1 ± 5.9 | 32.2 ± 4.8         | 31.1 ± 4.7  | 28.6 ± 20.2         | 15 ± 14.8  |
| 27     | OK662658          | R23_17                            | <i>Bacillus cereus</i>                               | 78.3                                          | 19.6 ± 3.5         | 36.2 ± 4            | 3.2 ± 2.6                                                | 6.9 ± 3.9  | 2.0 ± 2.9          | 0 ± 0       | 0 ± 0               | 0.9 ± 1.3  |
| 28     | OK662659          | R23_28                            | <i>Bacillus subtilis</i>                             | 73.3                                          | 47 ± 2.8           | 40.5 ± 4            | 35.4 ± 1.7                                               | 42.9 ± 0   | 34.3 ± 1.4         | 38.8 ± 4.0  | 26.2 ± 18.6         | 42.9 ± 2.4 |
| 29     | OK662660          | S1_29                             | <i>Enterobacter cloacae</i> subsp. <i>dissolvens</i> | 82.8                                          | 47.4 ± 10          | N.D.                | 3.3 ± 4.7                                                | 4.9 ± 2.6  | 2.2 ± 3.1          | 3.7 ± 3.5   | 1.0 ± 1.3           | 0 ± 0      |
| 30     | OK662661          | S2_11                             | <i>Janthinobacterium lividum</i>                     | 82.5                                          | 7.3 ± 6.8          | 30 ± 15.8           | 0 ± 0                                                    | 4.1 ± 3.9  | 0 ± 0              | 2.9 ± 4.0   | 16.2 ± 19.0         | 2.8 ± 3.9  |
| 31     | OK662662          | S2_18                             | <i>Janthinobacterium lividum</i>                     | 76.0                                          | 34 ± 11            | 0 ± 0               | 1.1 ± 1.5                                                | 0.9 ± 1.3  | 0 ± 0              | 1.0 ± 1.3   | 0 ± 0               | 1.9 ± 2.6  |

\*1 Growth inhibition rate is shown as mean value ± SD. More than 30% growth inhibition is shown in gray (n = 3)

(a) Against *F. culmorum*

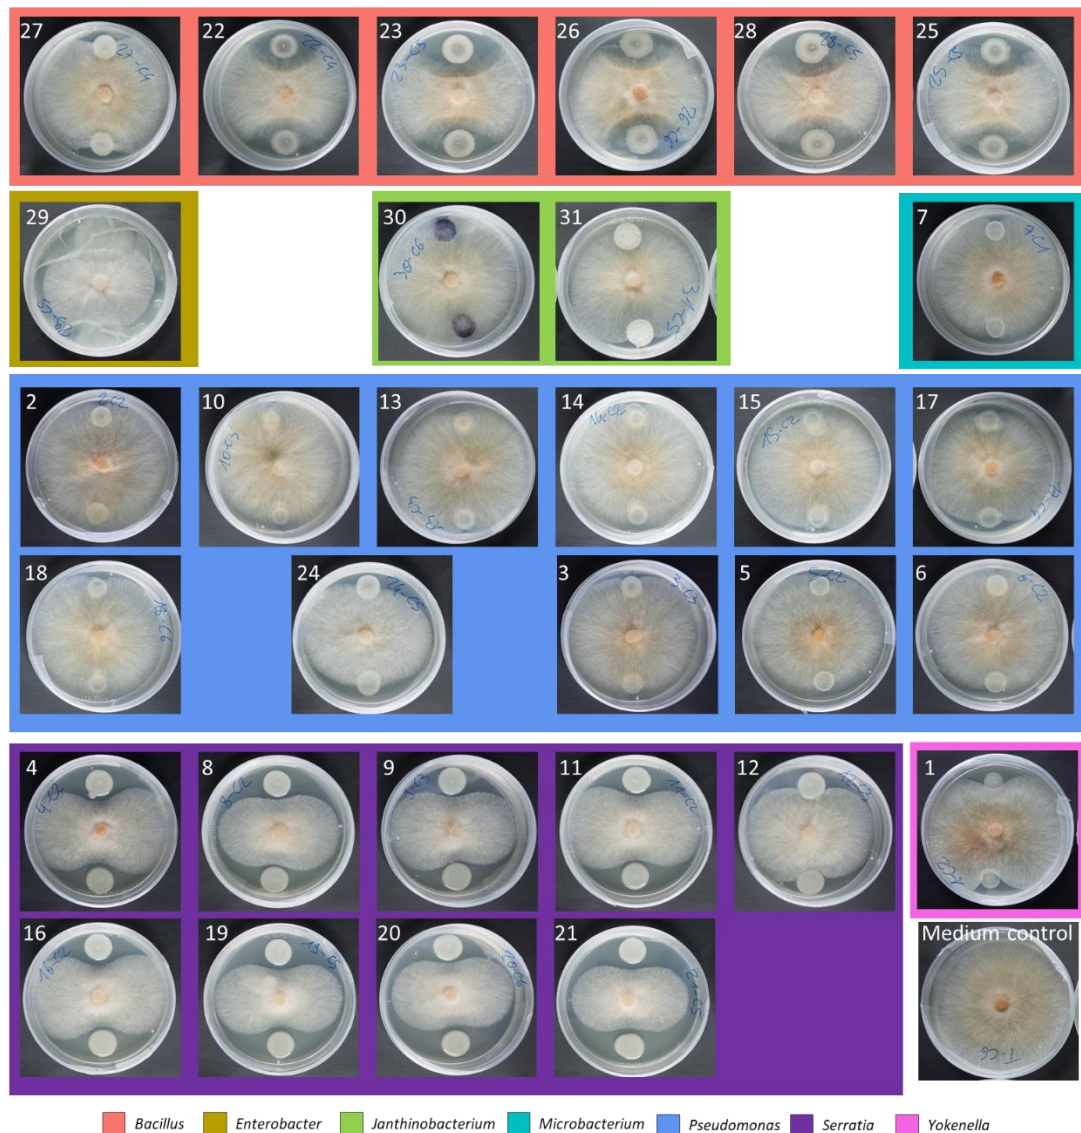

Figure S2 Dual culture test of Vetiver endophytes against *F. culmorum* (a) and *F. oxysporum* (b)



(b) Against *F. oxysporum*

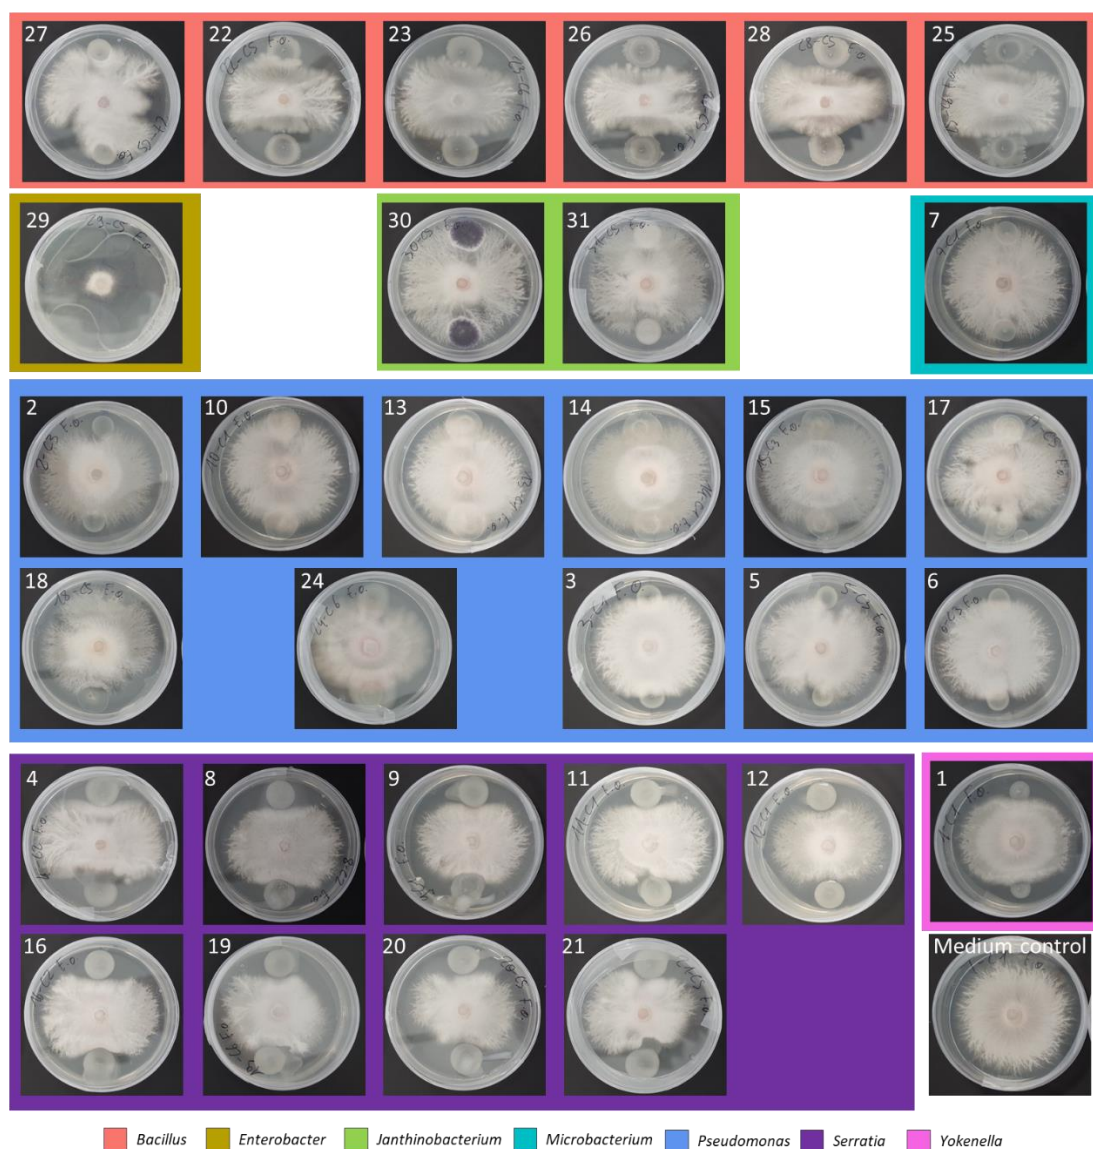

Figure S2 (Continued)

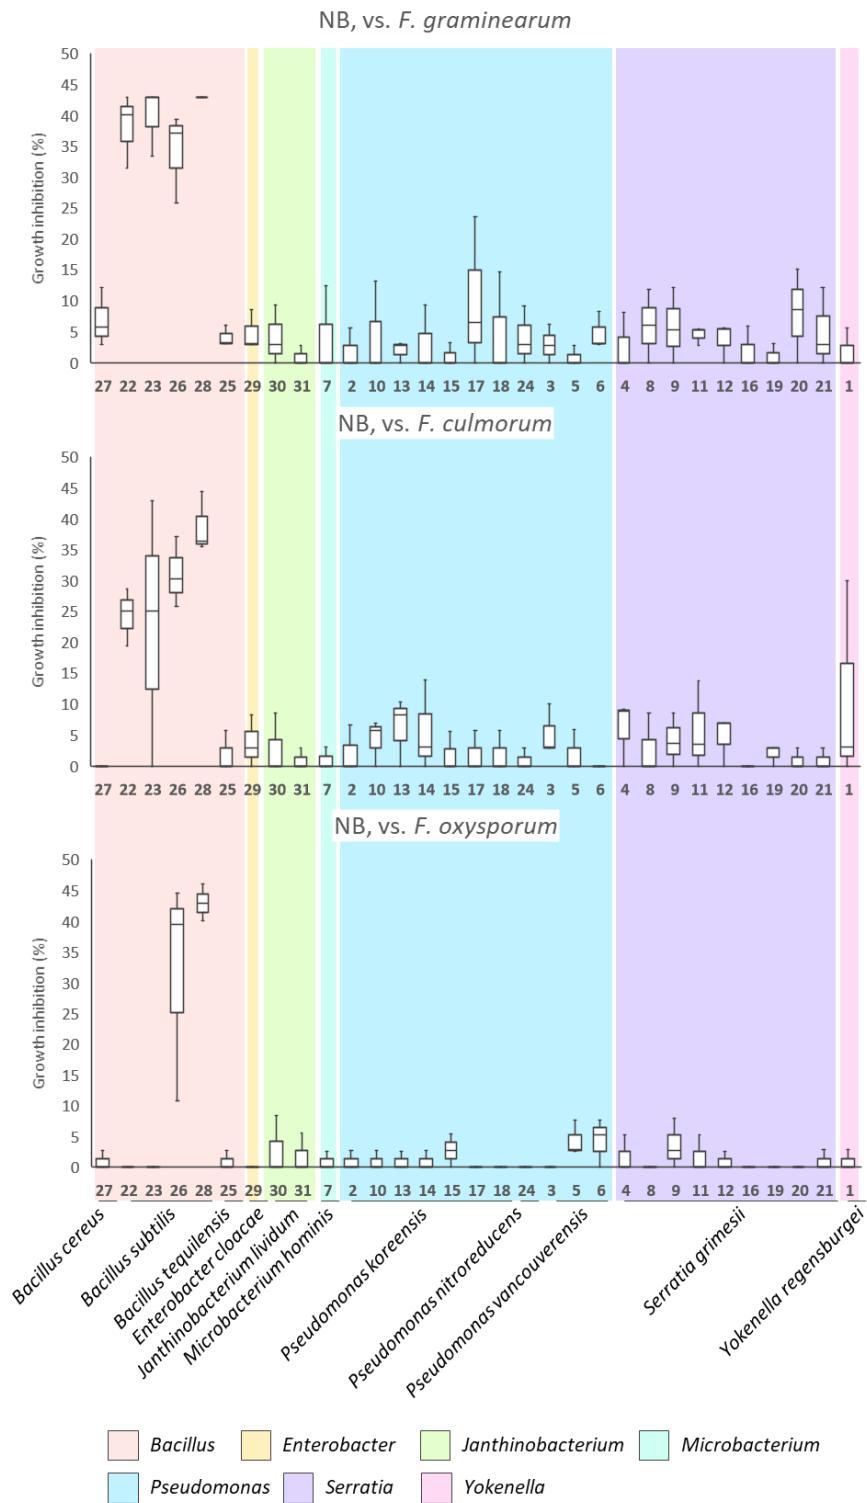

Figure S3 Growth inhibition rate of the cell-free supernatants of vetiver endophytic bacterial strains in NB against *F. graminearum*, *F. culmorum*, and *F. oxysporum* (n = 3)

(a) *E. coli*

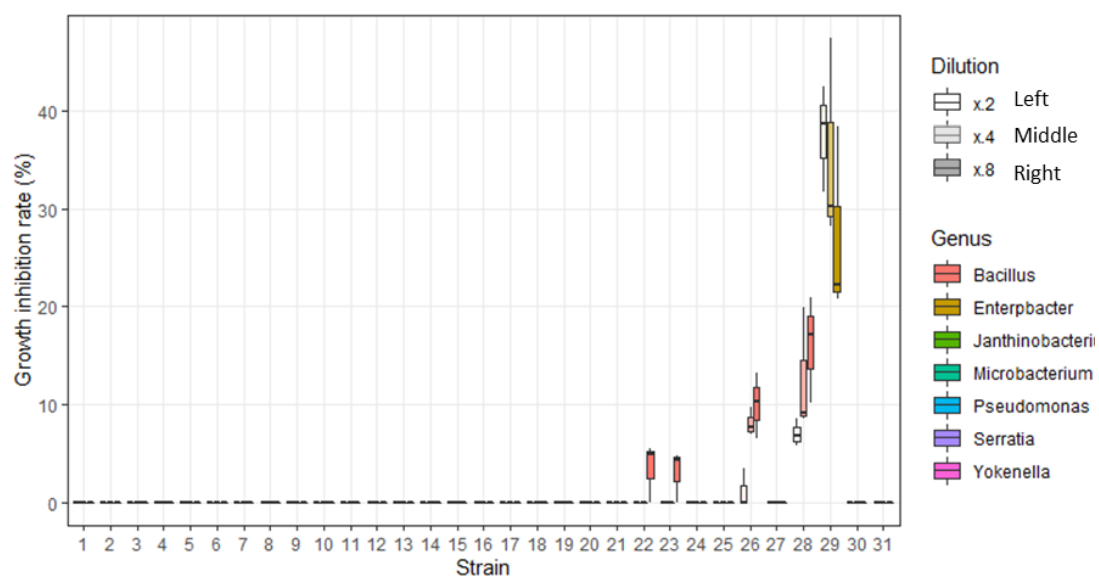

(b) *S. cerevisiae*

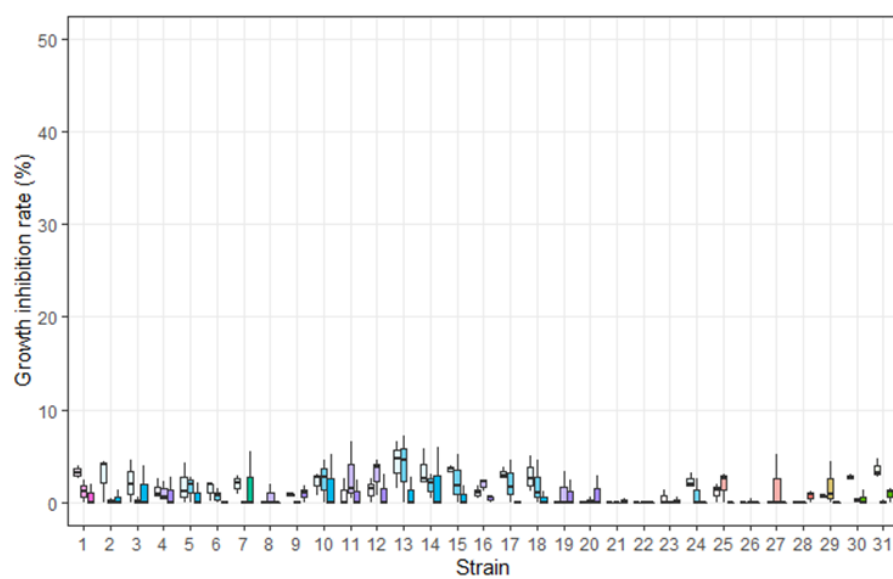

Figure S4 Growth inhibition rate of the cell-free supernatant of Vetiver endophytic strains against *E. coli* (a) and *S. cerevisiae* (b) (n = 3)

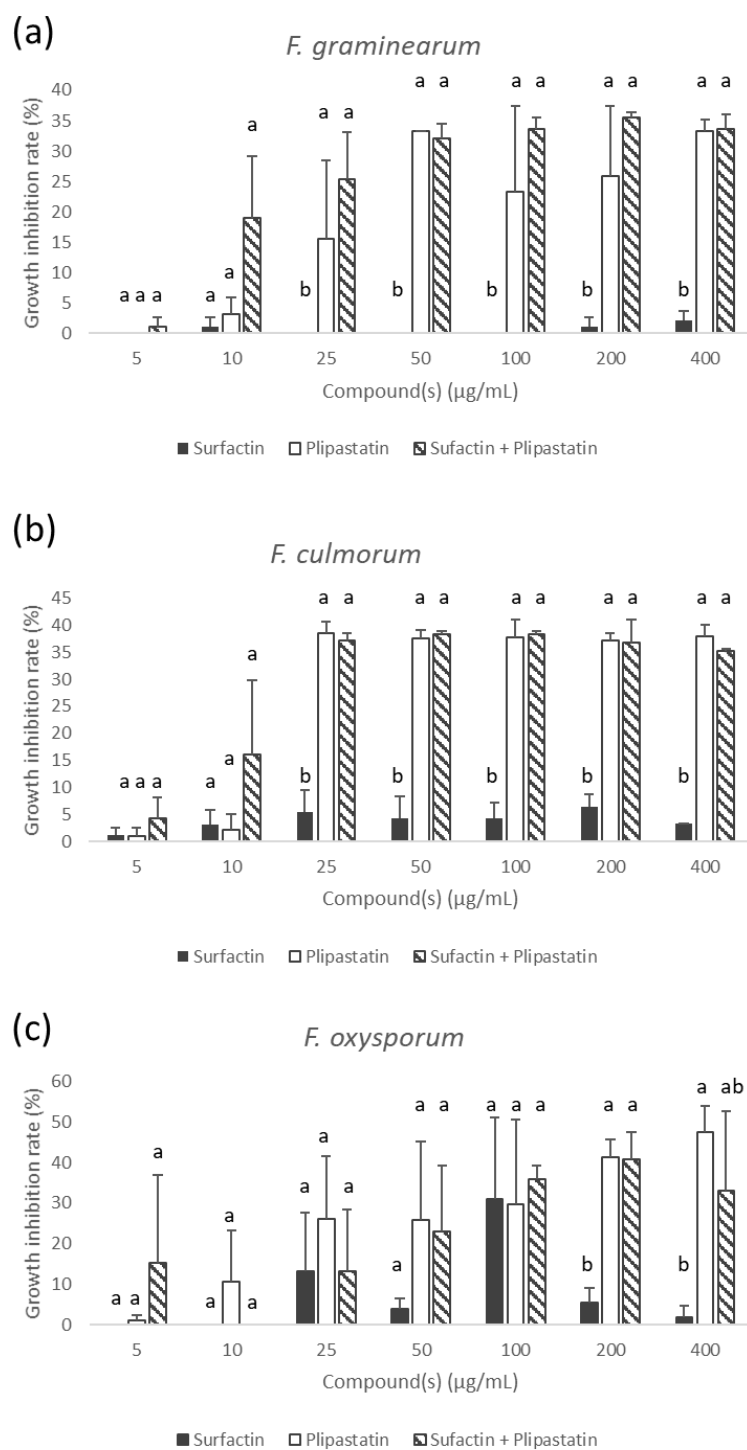

Figure S5 Growth inhibition rate of the solutions of commercial surfactins, plipastatins, and mixtures of the two lipopeptides against *F. graminearum* (a), *F. culmorum* (b), and *F. oxysporum*.(c). For each concentration, the same alphabets have no significant difference within a concentration (Tukey-Kramer test,  $p < 0.05$ ). (Error bars = standard deviation,  $n = 3$ )

## Figure S6 Liquid handler protocol for the high-throughput screening assays

REALCAT\Antimicrobial Activities\AntiMAct\_Liquid\_CMI\_RTU\_v2

12/3/2021 3:49:10 PM Page:1

Method

Author: Beckman Coulter Inc

Description:

-----  
Start

Define the following values for this method:

targStrainVol = 30000

targStrainNum = 3

speedPercent = 100

nbrOfMix = 5

nbrOfBatch = 3

firstColNum = 1

brothVol = 30000

brothNum = 1  
-----

Comment

Description:

Initial Setup

Comment:

Variables:

"brothNum": Stores the number of broth reservoir to use in the run (1 - 2)

"targStrainNum": Stores the number of inoculum reservoir to use in the run (3 - 4)

"firstColNum": Stores the column number of the first batch of supernatants to use (1 - 12)

"nbrOfBatch": Stores the number of batch (columns of supernatants & target plates) to use

and create during the run (1 - 3)

"nbrOfMix": Stores the number of mix action to perform at each mixing step

"speedPercent": Stores the move speed in wells for the tips

Plates:

"Batch\_1": Empty 96\_Plate for Vis reading at 595 nm

"Batch\_2": Empty 96\_Plate for Vis reading at 595 nm

"Batch\_3": Empty 96\_Plate for Vis reading at 595 nm

"Supernatants" : min 800µL of filtrated supernatant by well sorted in column (Batch)



/!\The batchs must be placed every two columns for the same run!

(Each batch corresponds to column of supernatants in the "Supernatants" plate - The analysis are made in technical triplicates in each plate (Batch)) )

Reservoirs:

"Broth1 + Broth2 + Inoc1 + Inoc2": 30000µL broth1 + 30000µL broth2 + 30000µL Inoculum

Strain 1 (OD = 0.1) + 30000µL Inoculum Strain 2 (OD = 0.1)

(Only one broth and inoculum is used per run of program. The two slots are here to have the opportunity to choose between two targets and broths)

"Trash": empty reservoir

-----  
Instrument Setup

Deck: REALCAT\_BKL

Pause to confirm setup.

Verify that the pod is set up in its default configuration.

Items:

FM1: Nothing

Holder1: Nothing

IN1: Nothing

MID1: Nothing

OUT1: Nothing

P1: Nothing

P10: Reserv\_Full\_Beckman named Trash with known volume: 0 µL of Water in all wells

\*\*\*Print Error\*\*\* Instrument Setup

-----  
Loop

Loop from "a" = "1" to "=nbrOfBatch", incrementing by "1".

-----  
Move Labware

Move the top "1" plates at "="P"&a+3" to "="P"&a" using pod "Pod1".

-----  
Group:

Broth Filling

-----  
Span-8 New Tips

REALCAT\Antimicrobial Activities\AntiMAct\_Liquid\_CML\_RTU\_v2

12/3/2021 3:49:10 PM Page:2

Get new P200B tips for all probes on Pod2.

Group:

Col1

Loop

Loop from "1" to "2", incrementing by "1".

Span-8 Aspirate

Using Pod2, Aspirate 100 µL from the labware at Broth1 + Broth2 + Inoc1 + Inoc2 using the

EHw\_Span-8t Reserv technique.

All probes will be used, with a spacing of 1.

The first selected probe will pipette from well =brothNum.

Override the technique height by moving to -5 mm from the liquid.

The liquid type is Water and the expected labware type is Reserv\_Modular\_40mL.

Span-8 Dispense

Using Pod2, Dispense 100 µL to the labware at ="Batch\_"&a using the EHw\_Span-8t technique.

All probes will be used, with a spacing of 1.

The first selected probe will pipette to well 1.

Override the technique height by moving to 0 mm from the liquid.

The liquid type is Water and the expected labware type is Plate\_96\_F\_Vis\_Greiner.

End Loop

End Group

Group:

Col2

Loop

Loop from "1" to "2", incrementing by "1".

Span-8 Aspirate

Using Pod2, Aspirate 75 µL from the labware at Broth1 + Broth2 + Inoc1 + Inoc2 using the

EHw\_Span-8t Reserv technique.

All probes will be used, with a spacing of 1.

The first selected probe will pipette from well =brothNum.

Override the technique height by moving to -5 mm from the liquid.

The liquid type is Water and the expected labware type is Reserv\_Modular\_40mL.

-----  
Span-8 Dispense

Using Pod2, Dispense 75 µL to the labware at ="Batch\_"&a using the EHw\_Span-8t technique.

All probes will be used, with a spacing of 1.

The first selected probe will pipette to well 2.

Override the technique height by moving to 0 mm from the liquid.

The liquid type is Water and the expected labware type is Plate\_96\_F\_Vis\_Greiner.

-----  
End Loop

-----  
End Group

-----  
Group:

Col3

-----  
Span-8 Aspirate

Using Pod2, Aspirate 100 µL from the labware at Broth1 + Broth2 + Inoc1 + Inoc2 using the

EHw\_Span-8t Reserv technique.

All probes will be used, with a spacing of 1.

The first selected probe will pipette from well =brothNum.

Override the technique height by moving to -5 mm from the liquid.

The liquid type is Water and the expected labware type is Reserv\_Modular\_40mL.

-----  
Span-8 Dispense

Using Pod2, Dispense 100 µL to the labware at ="Batch\_"&a using the EHw\_Span-8t technique.

All probes will be used, with a spacing of 1.

The first selected probe will pipette to well 3.

Override the technique height by moving to 0 mm from the liquid.

REALCAT\Antimicrobial Activities\AntiMAct\_Liquid\_CMI\_RTU\_v2

12/3/2021 3:49:10 PM Page:3

The liquid type is Water and the expected labware type is Plate\_96\_F\_Vis\_Greiner.

End Group

-----

Group:

Col5,6,8,9,11,12

-----

Loop

Loop from "b" = "1" to "7", incrementing by "3".

-----

Loop

Loop from "c" = "0" to "1", incrementing by "1".

-----

Span-8 Aspirate

Using Pod2, Aspirate 100 µL from the labware at Broth1 + Broth2 + Inoc1 + Inoc2 using the

EHw\_Span-8t Reserv technique.

All probes will be used, with a spacing of 1.

The first selected probe will pipette from well =brothNum.

Override the technique height by moving to -5 mm from the liquid.

The liquid type is Water and the expected labware type is Reserv\_Modular\_40mL.

-----

Span-8 Dispense

Using Pod2, Dispense 100 µL to the labware at ="Batch\_"&a using the EHw\_Span-8t technique.

All probes will be used, with a spacing of 1.

The first selected probe will pipette to well =4+b+c.

Override the technique height by moving to 0 mm from the liquid.

The liquid type is Water and the expected labware type is Plate\_96\_F\_Vis\_Greiner.

-----

End Loop

-----

End Loop

-----

End Group

-----

-----

End Group

-----

Group:

Supernatant Filling

Span-8 New Tips

Get new P200B tips for all probes on Pod2.

Move Labware

Move the top "1" plates at "P8" to "P9" using pod "Pod1".

Group:

Col2

If

If "a=1":

Then

Span-8 Aspirate

Using Pod2, Aspirate 50 µL from the labware at Supernatants using the EHw\_Span-8t

technique.

All probes will be used, with a spacing of 1.

The first selected probe will pipette from well =firstColNum.

Override the technique height by moving to -2 mm from the liquid.

The liquid type is Water and the expected labware type is DeepWell\_96\_U\_Square\_Greiner.

Span-8 Dispense

Using Pod2, Dispense 50 µL to the labware at ="Batch\_"&a using the EHw\_Span-8t technique.

All probes will be used, with a spacing of 1.

The first selected probe will pipette to well 2.

Override the technique height by moving to 0 mm from the liquid.

REALCAT\Antimicrobial Activities\AntiMAct\_Liquid\_CMI\_RTU\_v2

12/3/2021 3:49:10 PM Page:4

The liquid type is Water and the expected labware type is Plate\_96\_F\_Vis\_Greiner.

End

Else

-----

If

If "=a=2":

-----

Then

-----

Span-8 Aspirate

Using Pod2, Aspirate 50 µL from the labware at Supernatents using the EHw\_Span-8t

technique.

All probes will be used, with a spacing of 1.

The first selected probe will pipette from well =firstColNum+2.

Override the technique height by moving to -2 mm from the liquid.

The liquid type is Water and the expected labware type is DeepWell\_96\_U\_Square\_Greiner.

-----

Span-8 Dispense

Using Pod2, Dispense 50 µL to the labware at ="Batch\_"&a using the EHw\_Span-8t technique.

All probes will be used, with a spacing of 1.

The first selected probe will pipette to well 2.

Override the technique height by moving to 0 mm from the liquid.

The liquid type is Water and the expected labware type is Plate\_96\_F\_Vis\_Greiner.

-----

End

-----

Else

-----

Span-8 Aspirate

Using Pod2, Aspirate 50 µL from the labware at Supernatents using the EHw\_Span-8t

technique.

All probes will be used, with a spacing of 1.

The first selected probe will pipette from well =firstColNum+4.

Override the technique height by moving to -2 mm from the liquid.

The liquid type is Water and the expected labware type is DeepWell\_96\_U\_Square\_Greiner.

-----

Span-8 Dispense

Using Pod2, Dispense 50 µL to the labware at ="Batch\_"&a using the EHw\_Span-8t technique.



All probes will be used, with a spacing of 1.

The first selected probe will pipette to well 2.

Override the technique height by moving to 0 mm from the liquid.

The liquid type is Water and the expected labware type is Plate\_96\_F\_Vis\_Greiner.

-----

End

-----

End

-----

End Group

-----

-----

Group:

Col4,7,10

-----

If

If "a=1":

-----

Then

-----

Loop

Loop from "d" = "4" to "10", incrementing by "3".

-----

Span-8 Aspirate

Using Pod2, Aspirate 100 µL from the labware at Supernatents using the EHw\_Span-8t

technique.

All probes will be used, with a spacing of 1.

The first selected probe will pipette from well =firstColNum.

REALCAT\Antimicrobial Activities\AntiMact\_Liquid\_CMI\_RTU\_v2

12/3/2021 3:49:10 PM Page:5

Override the technique height by moving to -2 mm from the liquid.

The liquid type is Water and the expected labware type is DeepWell\_96\_U\_Square\_Greiner.

-----

Span-8 Dispense

Using Pod2, Dispense 100 µL to the labware at ="Batch\_"&a using the EHw\_Span-8t technique.

All probes will be used, with a spacing of 1.

The first selected probe will pipette to well =d.

Override the technique height by moving to 0 mm from the liquid.

The liquid type is Water and the expected labware type is Plate\_96\_F\_Vis\_Greiner.

-----

End Loop

-----

End

-----

Else

-----

If

If "a=2":

-----

Then

-----

Loop

Loop from "d" = "4" to "10", incrementing by "3".

-----

Span-8 Aspirate

Using Pod2, Aspirate 100 µL from the labware at Supernatents using the EHw\_Span-8t

technique.

All probes will be used, with a spacing of 1.

The first selected probe will pipette from well =firstColNum+2.

Override the technique height by moving to -2 mm from the liquid.

The liquid type is Water and the expected labware type is DeepWell\_96\_U\_Square\_Greiner.

-----

Span-8 Dispense

Using Pod2, Dispense 100 µL to the labware at ="Batch\_"&a using the EHw\_Span-8t technique.

All probes will be used, with a spacing of 1.

The first selected probe will pipette to well =d.

Override the technique height by moving to 0 mm from the liquid.

The liquid type is Water and the expected labware type is Plate\_96\_F\_Vis\_Greiner.

-----

End Loop

-----

End

-----  
Else  
-----

Loop

Loop from "d" = "4" to "10", incrementing by "3".  
-----

Span-8 Aspirate

Using Pod2, Aspirate 100 µL from the labware at Supernatents using the EHw\_Span-8t technique.

All probes will be used, with a spacing of 1.

The first selected probe will pipette from well =firstColNum+4.

Override the technique height by moving to -2 mm from the liquid.

The liquid type is Water and the expected labware type is DeepWell\_96\_U\_Square\_Greiner.  
-----

Span-8 Dispense

Using Pod2, Dispense 100 µL to the labware at ="Batch\_"&a using the EHw\_Span-8t technique.

All probes will be used, with a spacing of 1.

The first selected probe will pipette to well =d.

Override the technique height by moving to 0 mm from the liquid.

The liquid type is Water and the expected labware type is Plate\_96\_F\_Vis\_Greiner.  
-----

End Loop  
-----

End  
-----

End

REALCAT\Antimicrobial Activities\AntiMAct\_Liquid\_CMI\_RTU\_v2

12/3/2021 3:49:10 PM Page:6  
-----

End Group  
-----  
-----

Group:

Col5,8,11  
-----

If

If "a=1":

Then

Loop

Loop from "d" = "5" to "11", incrementing by "3".

Span-8 Aspirate

Using Pod2, Aspirate 100 µL from the labware at Supernatents using the EHW\_Span-8t technique.

All probes will be used, with a spacing of 1.

The first selected probe will pipette from well =firstColNum.

Override the technique height by moving to -2 mm from the liquid.

The liquid type is Water and the expected labware type is DeepWell\_96\_U\_Square\_Greiner.

Span-8 Dispense

Using Pod2, Dispense 100 µL to the labware at ="Batch\_"&a using the following technique:

Use the following pipetting template: Span-8

Calibration Offset: 0

Calibration Slope: 1.05

Minimum Pipetting Height: 0.5 mm

Prewet: True

Blowout: True

Follow Liquid: True

Height: 1.5 mm from the liquid

Mix: True

Mix Aspirate Speed: 100µL/s

Mix Aspirate Height: 1.5 mm from the bottom

Mix Dispense Speed: 400µL/s

Mix Dispense Height: -1.5 mm from the liquid

Mix Count: =nbrOfMix

Mix Volume: 50 µL

Operation speed: 5µL/s

Tip Touch: False

All probes will be used, with a spacing of 1.

The first selected probe will pipette to well =d.

Override the technique height by moving to 0 mm from the liquid.

The liquid type is Water and the expected labware type is Plate\_96\_F\_Vis\_Greiner.

-----

End Loop

-----

End

-----

Else

-----

If

If "a=2":

-----

Then

-----

Loop

Loop from "d" = "5" to "11", incrementing by "3".

-----

Span-8 Aspirate

Using Pod2, Aspirate 100 µL from the labware at Supernatents using the EHw\_Span-8t technique.

All probes will be used, with a spacing of 1.

The first selected probe will pipette from well =firstColNum+2.

Override the technique height by moving to -2 mm from the liquid.

REALCAT\Antimicrobial Activities\AntiMAct\_Liquid\_CMI\_RTU\_v2

12/3/2021 3:49:10 PM Page:7

The liquid type is Water and the expected labware type is DeepWell\_96\_U\_Square\_Greiner.

-----

Span-8 Dispense

Using Pod2, Dispense 100 µL to the labware at ="Batch\_"&a using the following technique:

Use the following pipetting template: Span-8

Calibration Offset: 0

Calibration Slope: 1.05

Minimum Pipetting Height: 0.5 mm

Prewet: True

Blowout: True

Follow Liquid: True

```
Height: 1.5 mm from the liquid

Mix: True

Mix Aspirate Speed: 100µL/s

Mix Aspirate Height: 1.5 mm from the bottom

Mix Dispense Speed: 400µL/s

Mix Dispense Height: -1.5 mm from the liquid

Mix Count: =nbrOfMix

Mix Volume: 50 µL

Operation speed: 5µL/s

Tip Touch: False

All probes will be used, with a spacing of 1.

The first selected probe will pipette to well =d.

Override the technique height by moving to 0 mm from the liquid.

The liquid type is Water and the expected labware type is Plate_96_F_Vis_Greiner.

-----

End Loop

-----

End

-----

Else

-----

Loop

Loop from "d" = "5" to "11", incrementing by "3".

-----

Span-8 Aspirate

Using Pod2, Aspirate 100 µL from the labware at Supernatents using the EHw_Span-8t
technique.

All probes will be used, with a spacing of 1.

The first selected probe will pipette from well =firstColNum+4.

Override the technique height by moving to -2 mm from the liquid.

The liquid type is Water and the expected labware type is DeepWell_96_U_Square_Greiner.

-----

Span-8 Dispense

Using Pod2, Dispense 100 µL to the labware at ="Batch_"&a using the following technique:

Use the following pipetting template: Span-8

Calibration Offset: 0
```



Calibration Slope: 1.05

Minimum Pipetting Height: 0.5 mm

Prewet: True

Blowout: True

Follow Liquid: True

Height: 1.5 mm from the liquid

Mix: True

Mix Aspirate Speed: 100µL/s

Mix Aspirate Height: 1.5 mm from the bottom

Mix Dispense Speed: 400µL/s

Mix Dispense Height: -1.5 mm from the liquid

Mix Count: =nbrOfMix

Mix Volume: 50 µL

Operation speed: 5µL/s

Tip Touch: False

All probes will be used, with a spacing of 1.

The first selected probe will pipette to well =d.

Override the technique height by moving to 0 mm from the liquid.

The liquid type is Water and the expected labware type is Plate\_96\_F\_Vis\_Greiner.

REALCAT\Antimicrobial Activities\AntiMact\_Liquid\_CMI\_RTU\_v2

12/3/2021 3:49:10 PM Page:8

-----

End Loop

-----

End

-----

End

-----

End Group

-----

-----

Move Labware

Move the top "1" plates at "P9" to "P8" using pod "Pod1".

-----

Group:

Col6,9,12

-----  
Loop

Loop from "d" = "5" to "11", incrementing by "3".  
-----

Span-8 Aspirate

Using Pod2, Aspirate 100 µL from the labware at ="Batch\_"&a using the following technique:

Use the following pipetting template: Span-8

Calibration Offset: 0

Calibration Slope: 1.05

Minimum Pipetting Height: 0.5 mm

Prewet: True

Aspirate Blowout: True

Follow Liquid: True

Height: -1.5 mm from the liquid

Mix: True

Mix Aspirate Speed: 100µL/s

Mix Aspirate Height: 1.5 mm from the liquid

Mix Dispense Speed: 400µL/s

Mix Dispense Height: -1.5 mm from the liquid

Mix Count: =nbrOfMix

Mix Volume: 50 µL

Operation speed: 5µL/s

Tip Touch: False

Trailing Air Gap: True

All probes will be used, with a spacing of 1.

The first selected probe will pipette from well =d.

Override the technique height by moving to -2 mm from the liquid.

The liquid type is Water and the expected labware type is Plate\_96\_F\_Vis\_Greiner.  
-----

Span-8 Dispense

Using Pod2, Dispense 100 µL to the labware at ="Batch\_"&a using the following technique:

Use the following pipetting template: Span-8

Calibration Offset: 0

Calibration Slope: 1.05

Minimum Pipetting Height: 0.5 mm

Prewet: True

Blowout: True

Follow Liquid: True

Height: 1.5 mm from the liquid

Mix: True

Mix Aspirate Speed: 100µL/s

Mix Aspirate Height: 1.5 mm from the bottom

Mix Dispense Speed: 400µL/s

Mix Dispense Height: -1.5 mm from the liquid

Mix Count: =nbrOfMix

Mix Volume: 50 µL

Operation speed: 5µL/s

Tip Touch: False

All probes will be used, with a spacing of 1.

The first selected probe will pipette to well =d+1.

Override the technique height by moving to 0 mm from the liquid.

REALCAT\Antimicrobial Activities\AntiMact\_Liquid\_CMI\_RTU\_v2

12/3/2021 3:49:10 PM Page:9

The liquid type is Water and the expected labware type is Plate\_96\_F\_Vis\_Greiner.

-----

End Loop

-----

Loop

Loop from "d" = "6" to "12", incrementing by "3".

-----

Span-8 Aspirate

Using Pod2, Aspirate 100 µL from the labware at ="Batch\_"&a using the EHW\_Span-8t technique.

All probes will be used, with a spacing of 1.

The first selected probe will pipette from well =d.

Override the technique height by moving to -2 mm from the liquid.

The liquid type is Water and the expected labware type is Plate\_96\_F\_Vis\_Greiner.

-----

Span-8 Dispense

Using Pod2, Dispense 100 µL to the labware at Trash using the EHW\_Span-8t Reserv technique.

All probes will be used, with a spacing of 1.

The first selected probe will pipette to well 1.

Override the technique height by moving to 2 mm from the liquid.

The liquid type is Water and the expected labware type is Reserv\_Full\_Beckman.

-----

End Loop

-----

End Group

-----

-----

End Group

-----

Group:

Innoculum Filling

-----

Span-8 New Tips

Get new P200B tips for all probes on Pod2.

-----

Group:

Col3

-----

Span-8 Aspirate

Using Pod2, Aspirate 100 µL from the labware at Broth1 + Broth2 + Inoc1 + Inoc2 using the

EHw\_Span-8t Reserv technique.

All probes will be used, with a spacing of 1.

The first selected probe will pipette from well =targStrainNum.

Override the technique height by moving to -4 mm from the liquid.

The liquid type is Water and the expected labware type is Reserv\_Modular\_40mL.

-----

Span-8 Dispense

Using Pod2, Dispense 100 µL to the labware at ="Batch\_"&a using the following technique:

Use the following pipetting template: Span-8

Calibration Offset: 0

Calibration Slope: 1.05

Minimum Pipetting Height: 0.5 mm

Prewet: True

Blowout: True

Follow Liquid: True

Height: 1.5 mm from the liquid

Mix: True

Mix Aspirate Speed: 100µL/s

Mix Aspirate Height: 1.5 mm from the bottom

Mix Dispense Speed: 400µL/s

Mix Dispense Height: -1.5 mm from the liquid

Mix Count: =nbrOfMix

Mix Volume: 50 µL

Operation speed: 5µL/s

Tip Touch: False

All probes will be used, with a spacing of 1.

REALCAT\Antimicrobial Activities\AntiMAct\_Liquid\_CMI\_RTU\_v2

12/3/2021 3:49:10 PM Page:10

The first selected probe will pipette to well 3.

Override the technique height by moving to 0 mm from the liquid.

The liquid type is Water and the expected labware type is Plate\_96\_F\_Vis\_Greiner.

-----

End Group

-----

-----

Group:

Col6,9,12

-----

Loop

Loop from "d" = "6" to "12", incrementing by "3".

-----

Span-8 Aspirate

Using Pod2, Aspirate 100 µL from the labware at Broth1 + Broth2 + Inoc1 + Inoc2 using the

EHw\_Span-8t Reserv technique.

All probes will be used, with a spacing of 1.

The first selected probe will pipette from well =targStrainNum.

Override the technique height by moving to -4 mm from the liquid.

The liquid type is Water and the expected labware type is Reserv\_Modular\_40mL.

-----

Span-8 Dispense

Using Pod2, Dispense 100 µL to the labware at ="Batch\_"&a using the EHW\_Span-8t technique.

All probes will be used, with a spacing of 1.

The first selected probe will pipette to well =d.

Override the technique height by moving to 0 mm from the liquid.

The liquid type is Water and the expected labware type is Plate\_96\_F\_Vis\_Greiner.

-----

End Loop

-----

End Group

-----

-----

Group:

Col5,8,11

-----

Loop

Loop from "d" = "5" to "11", incrementing by "3".

-----

Span-8 Aspirate

Using Pod2, Aspirate 100 µL from the labware at Broth1 + Broth2 + Inoc1 + Inoc2 using the

EHW\_Span-8t Reserv technique.

All probes will be used, with a spacing of 1.

The first selected probe will pipette from well =targStrainNum.

Override the technique height by moving to -4 mm from the liquid.

The liquid type is Water and the expected labware type is Reserv\_Modular\_40mL.

-----

Span-8 Dispense

Using Pod2, Dispense 100 µL to the labware at ="Batch\_"&a using the EHW\_Span-8t technique.

All probes will be used, with a spacing of 1.

The first selected probe will pipette to well =d.

Override the technique height by moving to 0 mm from the liquid.

The liquid type is Water and the expected labware type is Plate\_96\_F\_Vis\_Greiner.

-----

End Loop

-----

End Group

-----



-----  
Group:

Col5,8,11  
-----

Loop

Loop from "d" = "4" to "10", incrementing by "3".  
-----

Span-8 Aspirate

Using Pod2, Aspirate 100 µL from the labware at Broth1 + Broth2 + Inoc1 + Inoc2 using the

EHw\_Span-8t Reserv technique.

REALCAT\Antimicrobial Activities\AntiMAct\_Liquid\_CMI\_RTU\_v2

12/3/2021 3:49:10 PM Page:11

All probes will be used, with a spacing of 1.

The first selected probe will pipette from well =targStrainNum.

Override the technique height by moving to -4 mm from the liquid.

The liquid type is Water and the expected labware type is Reserv\_Modular\_40mL.  
-----

Span-8 Dispense

Using Pod2, Dispense 100 µL to the labware at ="Batch\_"&a using the EHw\_Span-8t technique.

All probes will be used, with a spacing of 1.

The first selected probe will pipette to well =d.

Override the technique height by moving to 0 mm from the liquid.

The liquid type is Water and the expected labware type is Plate\_96\_F\_Vis\_Greiner.  
-----

End Loop  
-----

End Group  
-----  
-----

Group:

Mixings  
-----

Loop

Loop from "d" = "6" to "12", incrementing by "3".  
-----

Span-8 Aspirate

Using Pod2, Aspirate 0 µL from the labware at ="Batch\_"&a using the following technique:

Use the following pipetting template: Span-8

Calibration Offset: 0

Calibration Slope: 1.05

Minimum Pipetting Height: 0.5 mm

Prewet: False

Aspirate Blowout: True

Follow Liquid: True

Height: -1.5 mm from the liquid

Mix: True

Mix Aspirate Speed: 100µL/s

Mix Aspirate Height: 1.5 mm from the liquid

Mix Dispense Speed: 400µL/s

Mix Dispense Height: -1.5 mm from the liquid

Mix Count: =nbrOfMix

Mix Volume: 50 µL

Operation speed: 5µL/s

Tip Touch: False

Trailing Air Gap: True

All probes will be used, with a spacing of 1.

The first selected probe will pipette from well =d.

The liquid type is Water and the expected labware type is Plate\_96\_F\_Vis\_Greiner.

-----  
Span-8 Dispense

Using Pod2, Dispense 0 µL to the labware at ="Batch\_"&a using the EHW\_Span-8t technique.

All probes will be used, with a spacing of 1.

The first selected probe will pipette to well =d.

Override the technique height by moving to 0 mm from the liquid.

The liquid type is Water and the expected labware type is Plate\_96\_F\_Vis\_Greiner.

-----  
End Loop

-----  
Loop

Loop from "d" = "5" to "11", incrementing by "3".

-----  
Span-8 Aspirate

Using Pod2, Aspirate 0 µL from the labware at ="Batch\_"&a using the following technique:

Use the following pipetting template: Span-8

Calibration Offset: 0

Calibration Slope: 1.05

Minimum Pipetting Height: 0.5 mm

Prewet: False

Aspirate Blowout: True

REALCAT\Antimicrobial Activities\AntiMact\_Liquid\_CMI\_RTU\_v2

12/3/2021 3:49:10 PM Page:12

Follow Liquid: True

Height: -1.5 mm from the liquid

Mix: True

Mix Aspirate Speed: 100µL/s

Mix Aspirate Height: 1.5 mm from the liquid

Mix Dispense Speed: 400µL/s

Mix Dispense Height: -1.5 mm from the liquid

Mix Count: =nbrOfMix

Mix Volume: 50 µL

Operation speed: 5µL/s

Tip Touch: False

Trailing Air Gap: True

All probes will be used, with a spacing of 1.

The first selected probe will pipette from well =d.

The liquid type is Water and the expected labware type is Plate\_96\_F\_Vis\_Greiner.

-----  
Span-8 Dispense

Using Pod2, Dispense 0 µL to the labware at ="Batch\_"&a using the EHw\_Span-8t technique.

All probes will be used, with a spacing of 1.

The first selected probe will pipette to well =d.

Override the technique height by moving to 0 mm from the liquid.

The liquid type is Water and the expected labware type is Plate\_96\_F\_Vis\_Greiner.

-----  
End Loop

-----  
Loop

Loop from "d" = "4" to "10", incrementing by "3".

-----  
Span-8 Aspirate

Using Pod2, Aspirate 0 µL from the labware at ="Batch\_"&a using the following technique:

Use the following pipetting template: Span-8

Calibration Offset: 0

Calibration Slope: 1.05

Minimum Pipetting Height: 0.5 mm

Prewet: False

Aspirate Blowout: True

Follow Liquid: True

Height: -1.5 mm from the liquid

Mix: True

Mix Aspirate Speed: 100µL/s

Mix Aspirate Height: 1.5 mm from the liquid

Mix Dispense Speed: 400µL/s

Mix Dispense Height: -1.5 mm from the liquid

Mix Count: =nbrOfMix

Mix Volume: 50 µL

Operation speed: 5µL/s

Tip Touch: False

Trailing Air Gap: True

All probes will be used, with a spacing of 1.

The first selected probe will pipette from well =d.

The liquid type is Water and the expected labware type is Plate\_96\_F\_Vis\_Greiner.

-----  
Span-8 Dispense

Using Pod2, Dispense 0 µL to the labware at ="Batch\_"&a using the EHw\_Span-8t technique.

All probes will be used, with a spacing of 1.

The first selected probe will pipette to well =d.

Override the technique height by moving to 0 mm from the liquid.

The liquid type is Water and the expected labware type is Plate\_96\_F\_Vis\_Greiner.

-----  
End Loop

-----  
End Group

Span-8 Discard Tips

Discard tips from all probes on Pod2.

-----  
REALCAT\Antimicrobial Activities\AntiMact\_Liquid\_CMI\_RTU\_v2

12/3/2021 3:49:10 PM Page:13

End Group

-----  
Move Labware

Move the top "1" plates at "="P"&a" to "="P"&a+3" using pod "Pod1".

-----  
End Loop

-----  
Finish

Method completed.

Remove the tips from all pods. Clear all labware from the deck. Clear all labware from

SILAS devices. Clear all global variables.

---

Method

Author: Beckman Coulter Inc

Description:

-----

Start

-----

FilterMax: Initialize the device, readying it for automated use.

-----

FilterMax: Prepare the device for placement of a piece of labware.

-----

Position: Pelt96\_1

Action: Initialize

-----

Instrument Setup

Deck: REALCAT\_BKL

Verify that the pod is set up in its default configuration.

Items:

FM1: Nothing

Holder1: Nothing

IN1: Nothing

MID1: Nothing

OUT1: Nothing

P1: Nothing

P10: Nothing

P11: Nothing

P12: Nothing

P13: Nothing

P2: Nothing

P3: Plate\_96\_F\_Vis\_Greiner named ReadPlate with known volume: 200 µL of Water in all

wellslid\_standard\_greiner named Lid\_ReadPlate

P4: Nothing

P5: Nothing

P6: Nothing

P7: Nothing



P8: Nothing

P9: Nothing

Pelt96\_1: Nothing

PeltFlat\_1: Nothing

SPE1: Nothing

TL1: Nothing

TR1: Nothing

W1: Nothing

-----  
Move Labware

Move the entire stack of labware at "P3" to "Pelt96\_1" using pod "Pod1".

-----  
Position: Pelt96\_1

Action: Start Shaking

Deluxe Shake?: False

Shake Speed: 900

Shake Style: Orbital (clockwise)

-----  
Pause

Pause "the whole system" for "300" seconds.

-----  
Position: Pelt96\_1

Action: Stop Shaking

-----  
Move Labware

Move the entire stack of labware at "Pelt96\_1" to "P1" using pod "Pod1".

-----  
Move Labware

Move the top "1" plates at "P1" to "P2" using pod "Pod1".

-----  
Move Labware

Move the entire stack of labware at "P1" to "FM1" using pod "Pod1".

-----  
FilterMax: Run a predefined protocol

REALCAT\Antimicrobial Activities\AntiMact\_Liquid\_CMI\_Reading\_RTU

12/3/2021 3:51:13 PM Page:2

---

Move Labware

Move the entire stack of labware at "FM1" to "P3" using pod "Pod1".

---

Move Labware

Move the entire stack of labware at "P2" to "P3" using pod "Pod1".

---

Finish

Method completed.

Remove the tips from all pods. Clear all labware from the deck. Clear all labware from

SILAS devices. Clear all global variables.

---

## Figure S7 Liquid handler protocols for the MALDI-Tof target preparation

REALCAT\MALDI\MALDI\_96\_PCR\_Samples+Matrix

12/3/2021 3:52:45 PM Page:1

Method

Author: Beckman Coulter Inc

Description:

-----

Start

-----

Instrument Setup

Deck: REALCAT\_BKL

Pause to confirm setup.

Verify that the pod is set up in its default configuration.

Items:

FM1: Nothing

Holder1: Nothing

IN1: Nothing

MID1: Nothing

OUT1: Nothing

P1: Nothing

P10: Nothing

P11: Nothing

P12: Nothing

P13: Nothing

P2: Nothing

P3: Nothing

P4: Nothing

P5: Custom\_MALDI\_LowProf named Target with known volume: 0 µL of Water in all wells

P6: Nothing

P7: PCR\_96\_FS\_4Titide named Samples with an unknown volume of Water in all

wells.Lid\_PCR\_4Titide named Lid\_Samples

P8: PCR\_96\_FS\_4Titide named Matrix with known volume: 15 µL of Organic in all

wellsLid\_PCR\_4Titide named Lid\_Matrix

P9: Nothing

Pelt96\_1: Nothing

PeltFlat\_1: Nothing

SPE1: Nothing

TL1: Tips\_AP96\_20uL named P20. Discard the tips to "<Tipbox>". When done, move the box to

"<Home>". Use these tips "1" times.

TR1: Nothing

W1: Nothing

-----

Group:

Moves

-----

Move Labware

Move the top "1" plates at "P7" to "P4" using pod "Pod1".

-----

Move Labware

Move the top "1" plates at "P8" to "P9" using pod "Pod1".

-----

End Group

-----

Group:

Mixing

-----

New Tips

Load new tips of type "P20" onto pod "Pod1".

-----

Aspirate

Using "Pod1", aspirate "15" µL of "Water" from section 1 of the "PCR\_96\_FS\_4Titide"

labware at "Samples" using the following technique:

Use the following pipetting template: AP96

Calibration Offset: 0

Calibration Slope: 1.04

Minimum Pipetting Height: 0.5 mm

Prewet: False

Aspirate Blowout: False

Follow Liquid: False

Height: 1.5 mm from the bottom

Mix: True

REALCAT\MALDI\MALDI\_96\_PCR\_Samples+Matrix

12/3/2021 3:52:45 PM Page:2

Mix Aspirate Speed: 100µL/s

Mix Aspirate Height: 1.5 mm from the bottom

Mix Dispense Speed: 400µL/s

Mix Dispense Height: 3 mm from the bottom

Mix Count: 10

Mix Volume: 20 µL

Operation speed: 100µL/s

Tip Touch: False

Trailing Air Gap: True

Override the technique height by moving to "1.5" mm from the bottom.

-----  
Dispense

Using "Pod1", dispense "15" µL of "Water" to section 1 of the "PCR\_96\_FS\_4Titide" labware

at "Matrix" using the following technique:

Use the following pipetting template: AP96

Calibration Offset: 0

Calibration Slope: 1.04

Minimum Pipetting Height: 0.5 mm

Prewet: True

Blowout: False

Follow Liquid: False

Height: 1.5 mm from the bottom

Mix: True

Mix Aspirate Speed: 75µL/s

Mix Aspirate Height: 1 mm from the bottom

Mix Dispense Speed: 400µL/s

Mix Dispense Height: 3 mm from the bottom

Mix Count: 5

Mix Volume: 10 µL

Operation speed: 10µL/s

Tip Touch: False

Override the technique height by moving to "-1" mm from the liquid.

-----  
End Group  
-----

Group:

Spotting

-----

Loop

Loop from "a" = "1" to "4", incrementing by "1".

-----

Aspirate

Using "Pod1", aspirate "2" µL of "Organic" from section 1 of the "PCR\_96\_FS\_4Titide"

labware at "Matrix" using (Not Auto-Selected) "EHo\_AP96 MALDI" technique.

-----

Dispense

Using "Pod1", dispense "2" µL of "Organic" to sections "=a", of the "Custom\_MALDI\_LowProf"

labware at "Target" using (Not Auto-Selected) "EHo\_AP96 MALDI" technique.

-----

End Loop

-----

Unload Tips

Unload the tips from pod "Pod1".

-----

End Group

-----

Group:

Moves

-----

Move Labware

Move the entire stack of labware at "P9" to "P8" using pod "Pod1".

-----

Move Labware

Move the entire stack of labware at "P4" to "P7" using pod "Pod1".

-----

End Group

REALCAT\MALDI\MALDI\_96\_PCR\_Samples+Matrix

12/3/2021 3:52:45 PM Page:3

-----

Finish

Method completed.

Remove the tips from all pods. Clear all labware from the deck. Clear all labware from

SILAS devices. Clear all global variables.

---
